# Supplementary material
Source: PubMed Central journal article supplement (PMC3330200)
Supplement: NIHMS339640-supplement-1.pdf [file NIHMS339640-supplement-1.pdf]

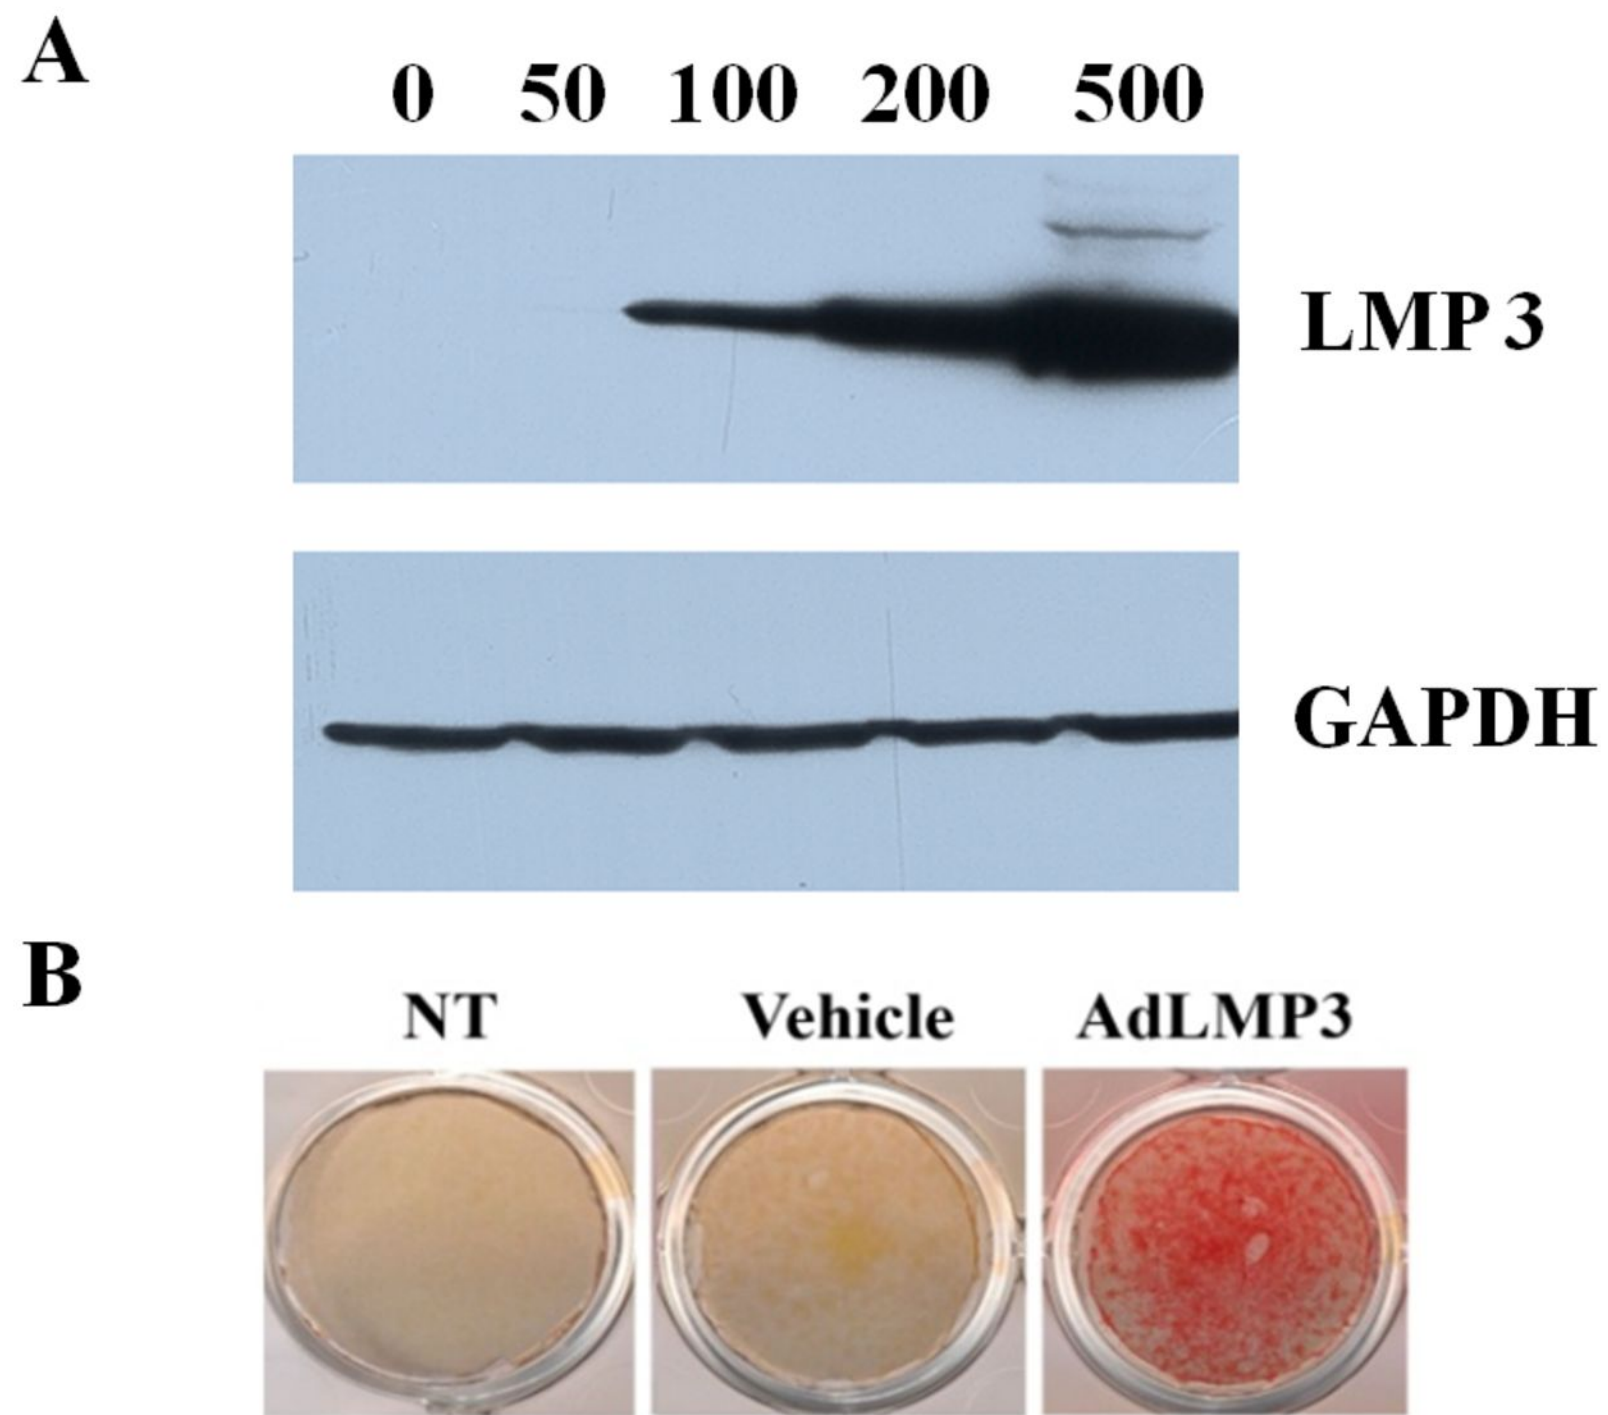

**Supplementary Figure 1. LMP3 promotes mineralization in BMSCs *in vitro*.** (A) BMSC cells were transduced overnight with AdLMP3 at various MOIs. Total protein lysate was harvested at day 3 and the exogenous LMP3 protein expression was analyzed by Western blot analysis. (B) BMSC cells were transduced with AdLMP3 or vector-only adenovirus. Cells were then induced to osteogenic differentiation. At 2w, extracellular calcium was measured by Alizarin Red staining. (NT: no treatment)
